# Supplementary material for: Tigecycline Heteroresistance and Resistance Mechanism in Clinical Isolates of Acinetobacter baumannii
Source: PubMed Central journal article supplement (PMC8557860; doi:10.1128/spectrum.01010-21), 2021-09-15

**Supplementary Table S1.** Primers used in this study

| Primers                       | Sequence (5'-3')           |
|-------------------------------|----------------------------|
| Primers for sequencing        |                            |
| <i>adeA</i> -F                | ATGCAAAAGCATCTTTTACTTCCT   |
| <i>adeA</i> -R                | TCATGGTTGTGCCCTTCAG        |
| <i>adeB</i> -F                | ATGATGTCACAATTTTTTATTCGTCG |
| <i>adeB</i> -F2               | TGGTTTGACCGTAGTTTC         |
| <i>adeB</i> -R                | TTAAGATGAGATTTTTTTCTTAGAGG |
| <i>adeB</i> -R2               | CATAAATGCTGTTGGCCA         |
| <i>adeC</i> -F                | ATGTCTAAATCGACAATCGTATCT   |
| <i>adeC</i> -R                | TTAGACTTTTGATATTCCTCCTCCT  |
| <i>adeR</i> -F                | ATGTTTGATCATTCTTTTTCTT     |
| <i>adeR</i> -R                | TTAGGCGTCATCTTTTACAG       |
| <i>adeR</i> -R2               | ATAACACTCATGCCTTCACG       |
| <i>adeS</i> -F                | CTGTAAAAGATGACGCCTAA       |
| <i>adeS</i> -R                | AAAATAGCTTTAAAACGATCCAT    |
| <i>adeS</i> -R2               | GCTTAAAGTCCGTAAGTC         |
| <i>rpsJ</i> -F                | GCAATAGAGTTCGTGGTCAAT      |
| <i>rpsJ</i> -R                | ATACCACATTTGCGACCGAC       |
| Primers for identification    |                            |
| <i>tet(X)</i> -F <sup>a</sup> | ACGGAAGTTGAAGAAACAGG       |
| <i>tet(X)</i> -R <sup>a</sup> | ATTCCAAAATGCAATGCACC       |
| <i>tet(X4)</i> -F             | ATGTCGAGCAAGGAAGCAAA       |
| <i>tet(X4)</i> -R             | CATCTCCAAGTAGCGTCACC       |
| <i>tet(X5)</i> -F             | GGGCCAACCCTACACTTC         |
| <i>tet(X5)</i> -R             | TTGGTGATCCACATCTCGT        |
| Primers for qRT-PCR           |                            |
| <i>qadeB</i> -F               | TGGTTTGACCGTAGTTTC         |
| <i>qadeB</i> -R               | CATAAATGCTGTTGGCCA         |
| <i>qadeS</i> -F               | CATGAGTTAAGAACGCCT         |
| <i>qadeS</i> -R               | GCTTAAAGTCCGTAAGTC         |

**Supplementary Fig. S1.** The relative mRNA expression levels of *adeB* and *adeS* in the three wild-type isolates (FA56, FA154, and F-1757) and their tigecycline-resistant subpopulations (FA#-R) and mutants obtained after serial passages in the antibiotic-free media (FA#-R-P10, FA#-R-P20, and FA#-R-P30). The expression was measured as a relative quantity by qRT-PCR using the reference gene *rpoB*.

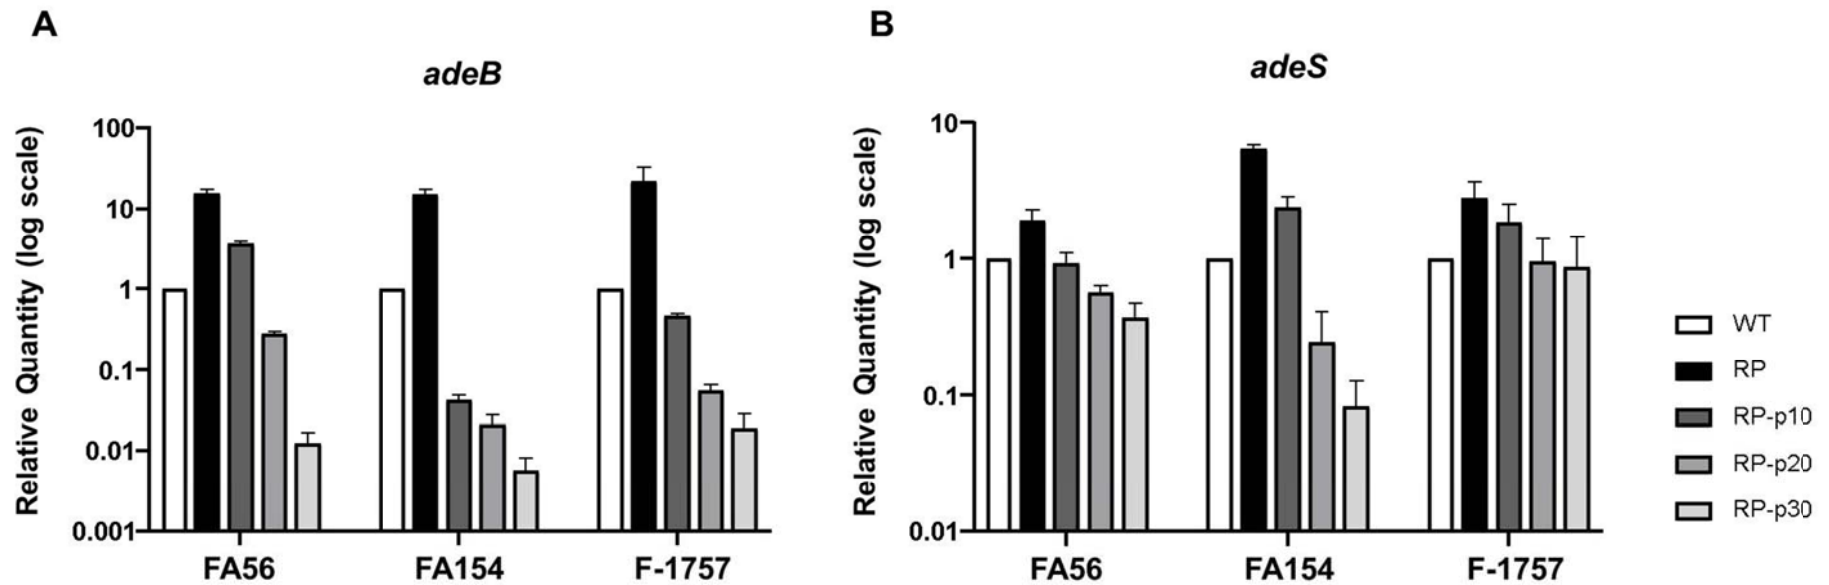

Supplement: spectrum01010-21_supp_1_seq2.pdf [file spectrum01010-21_supp_1_seq2.pdf]
